# Supplementary material for: Identification of m6A-Related lncRNAs Associated With Prognoses and Immune Responses in Acute Myeloid Leukemia
Source: PubMed Central journal article supplement (PMC8637120; doi:10.3389/fcell.2021.770451), 2021-11-16

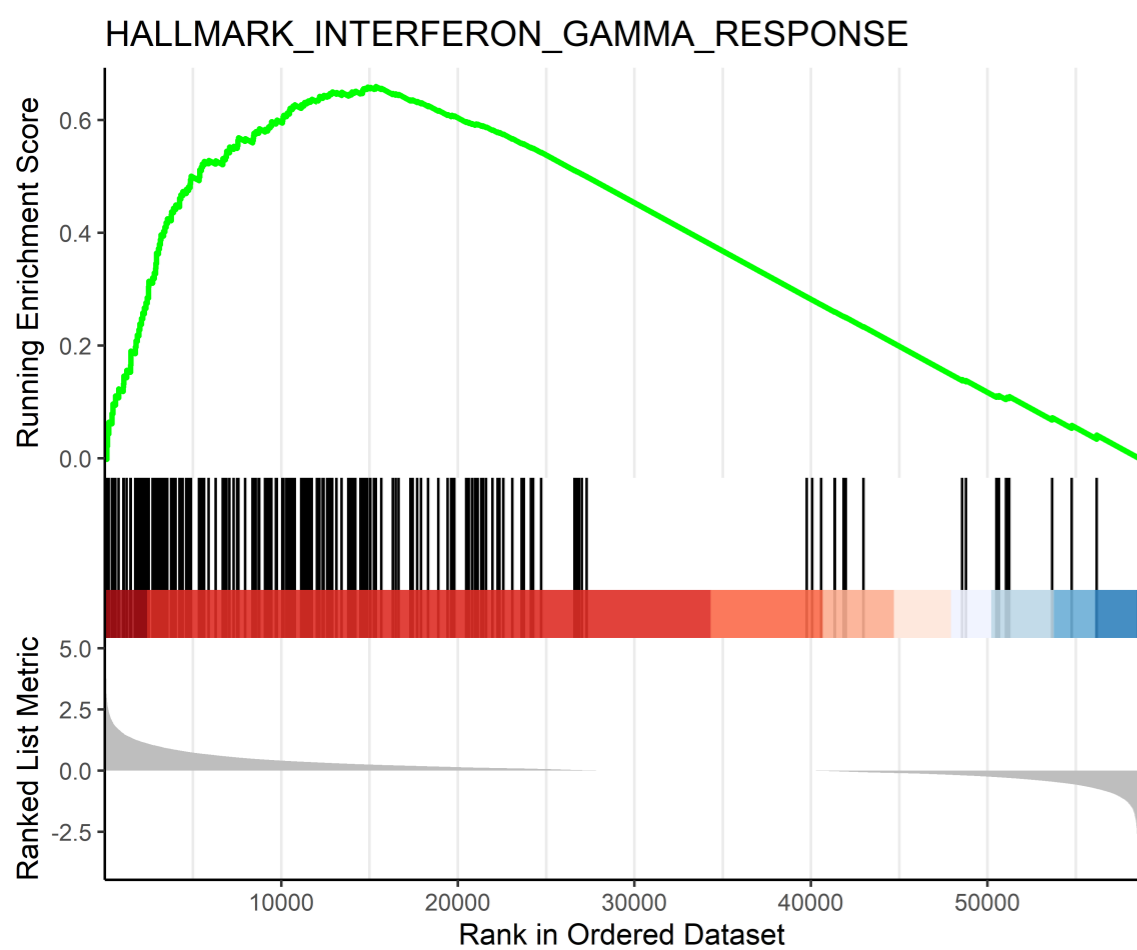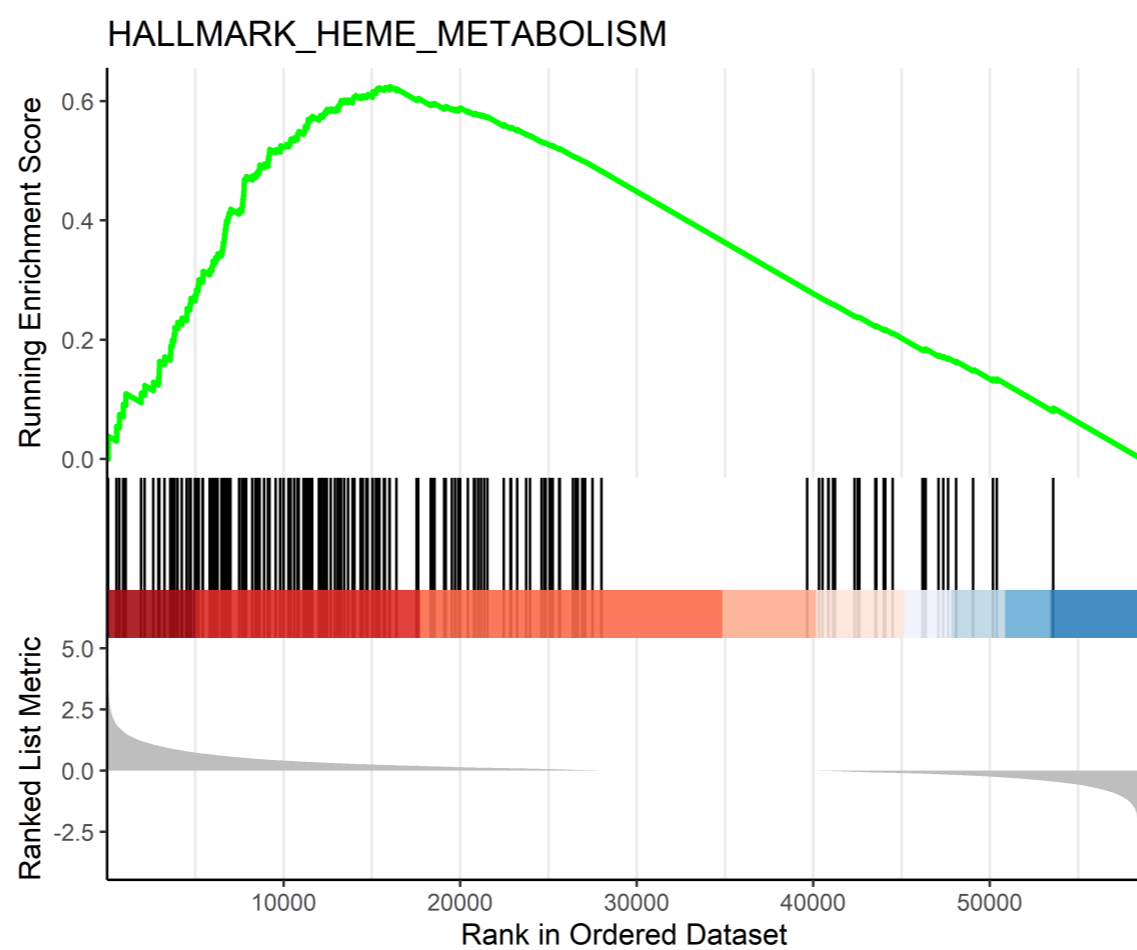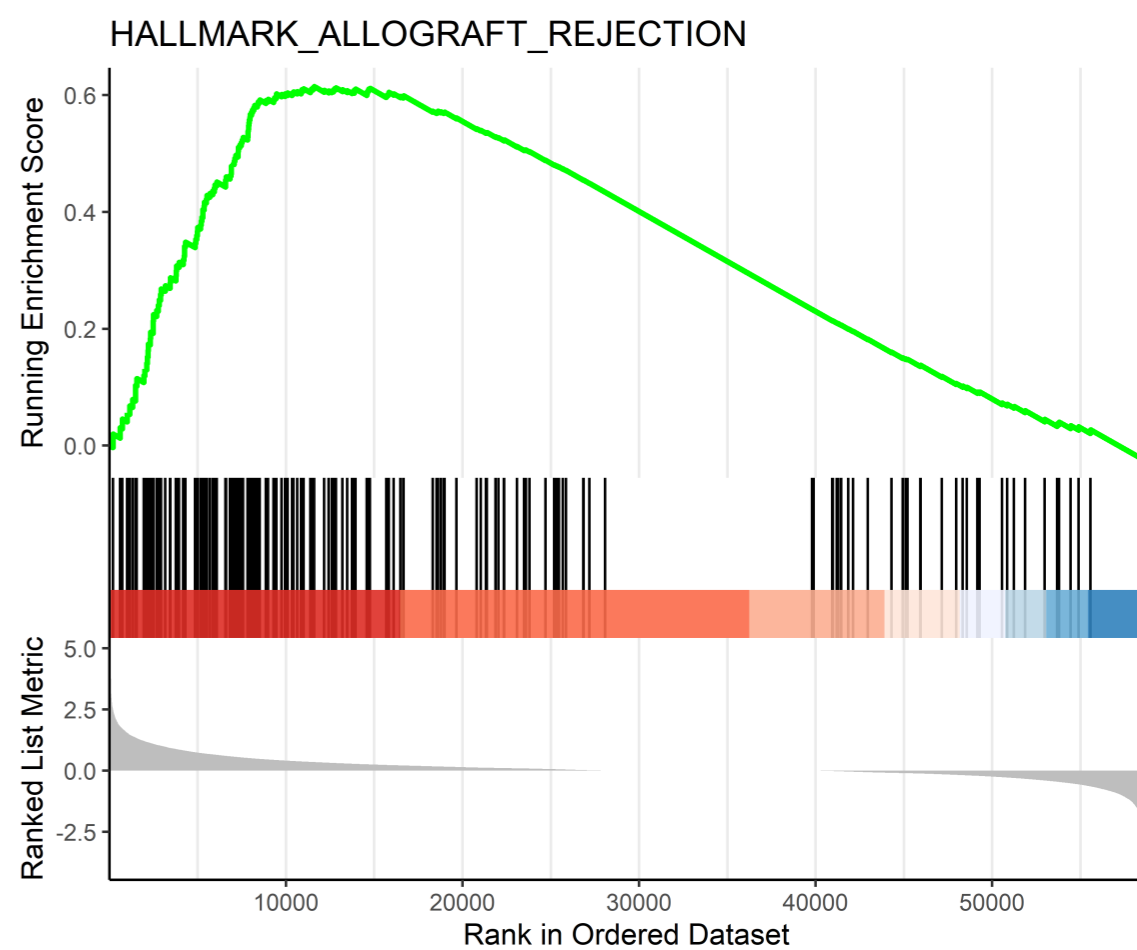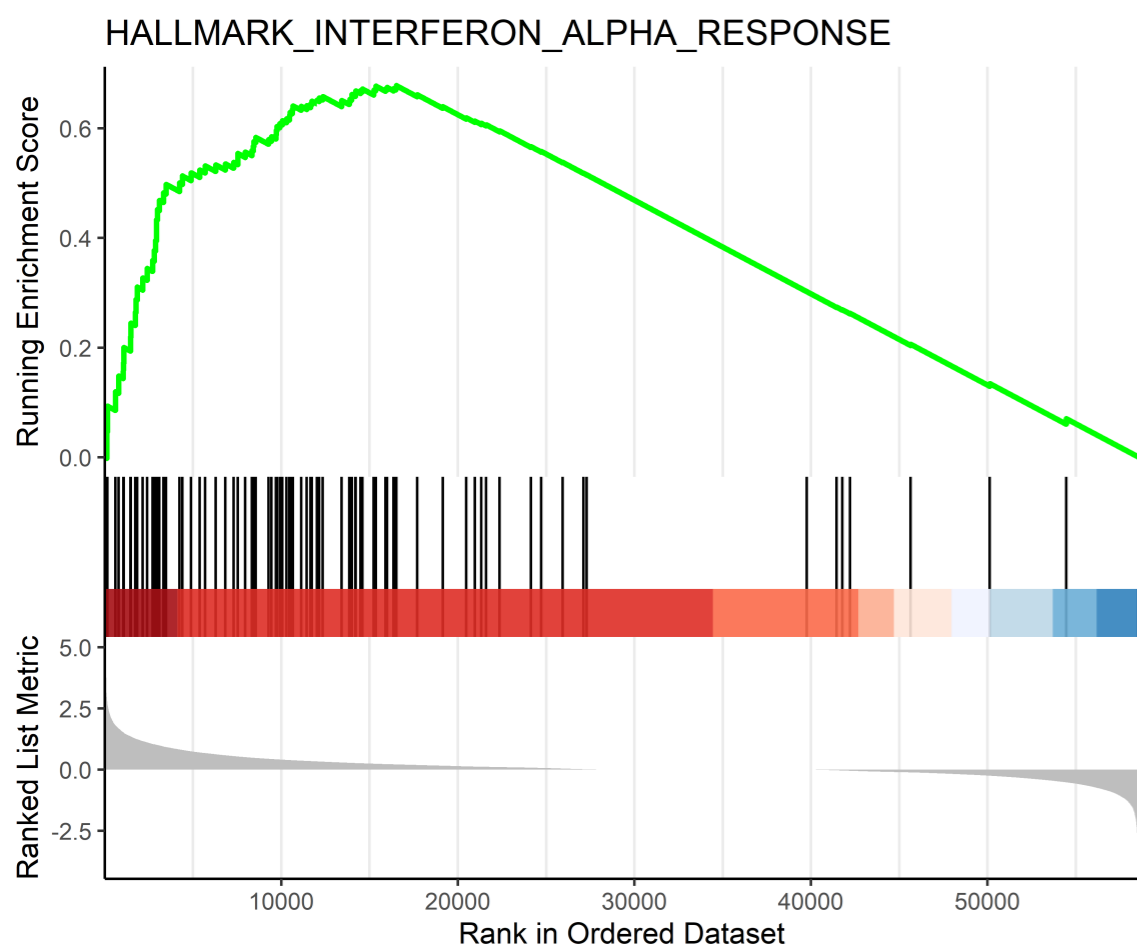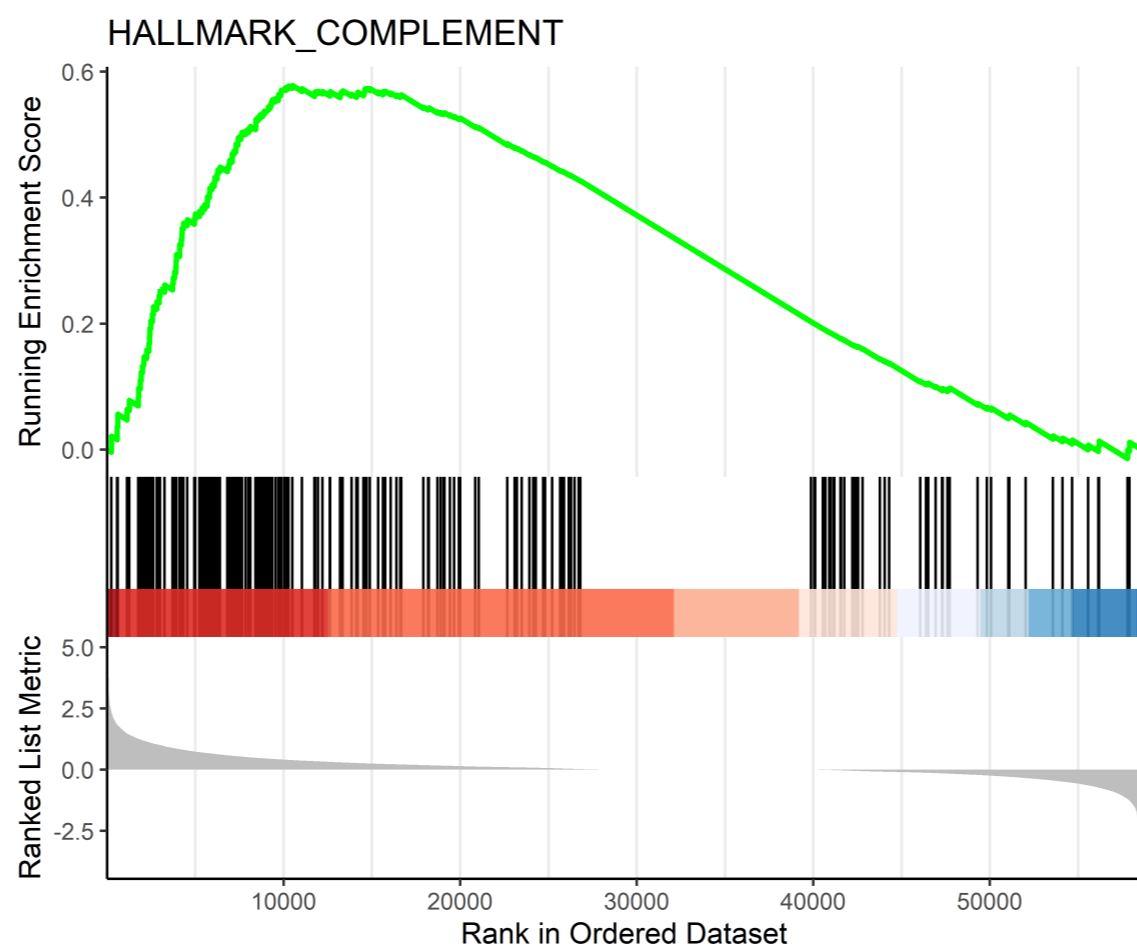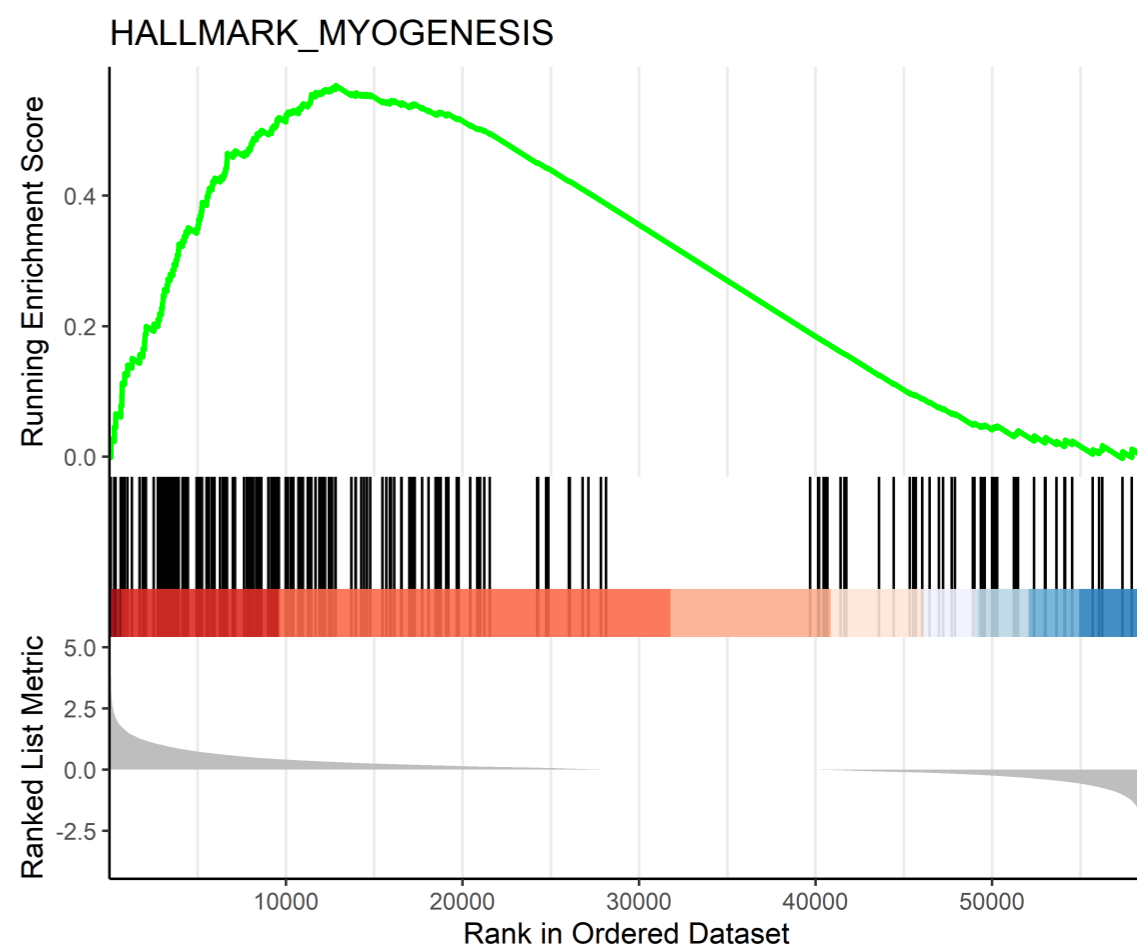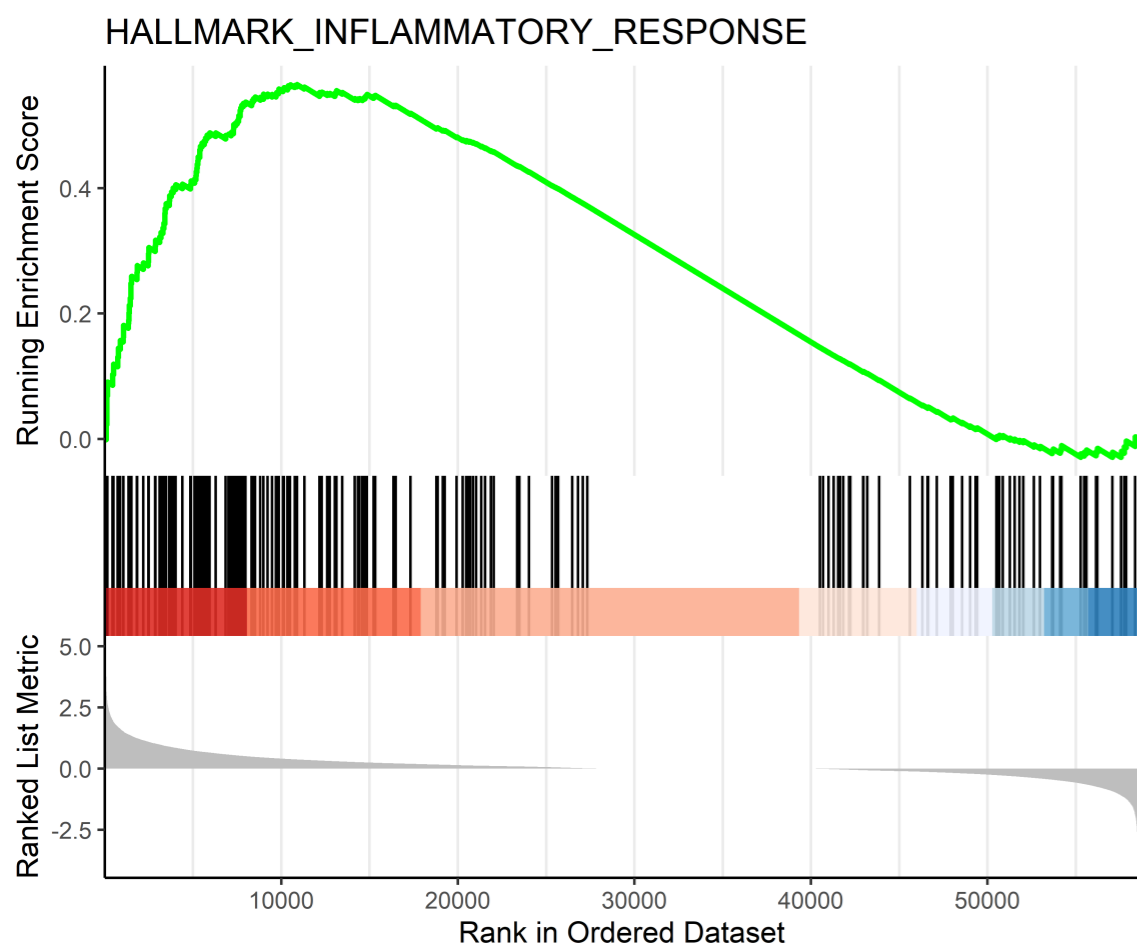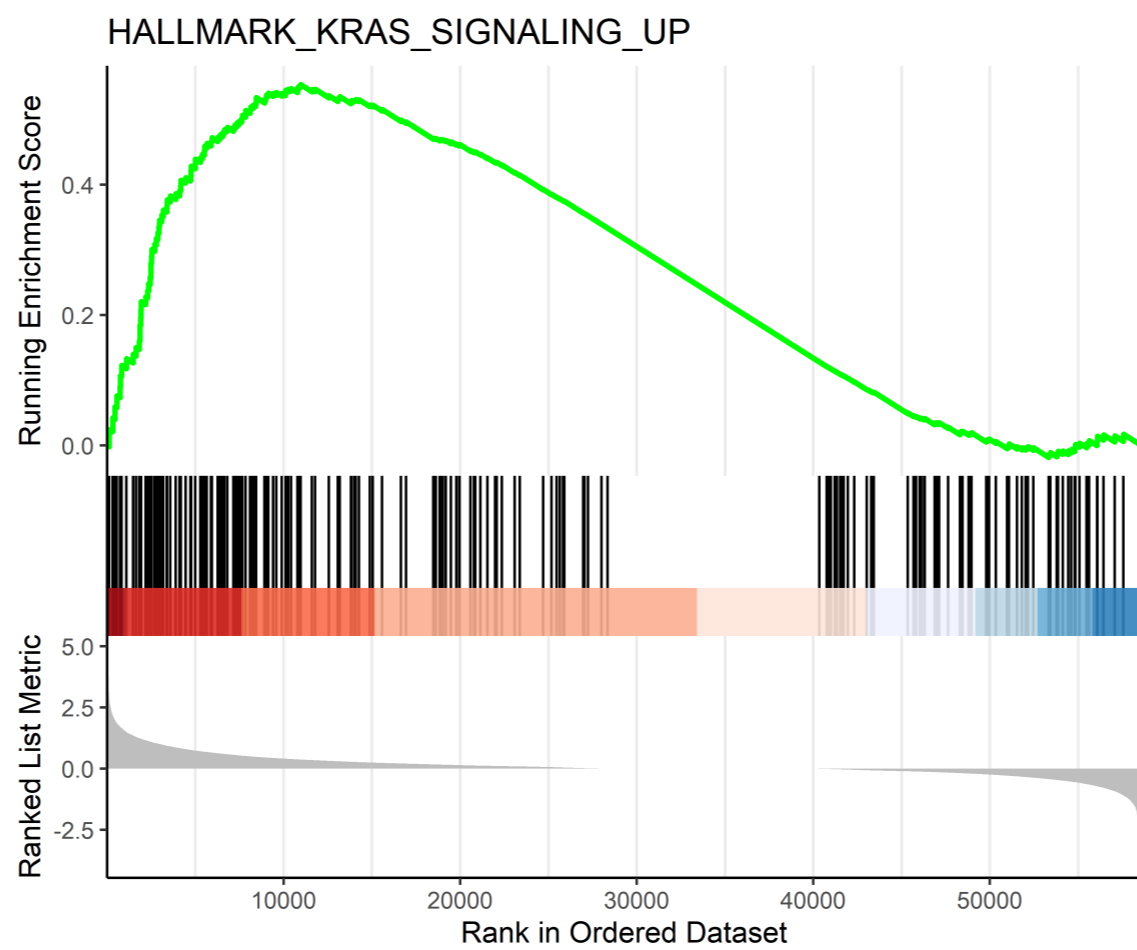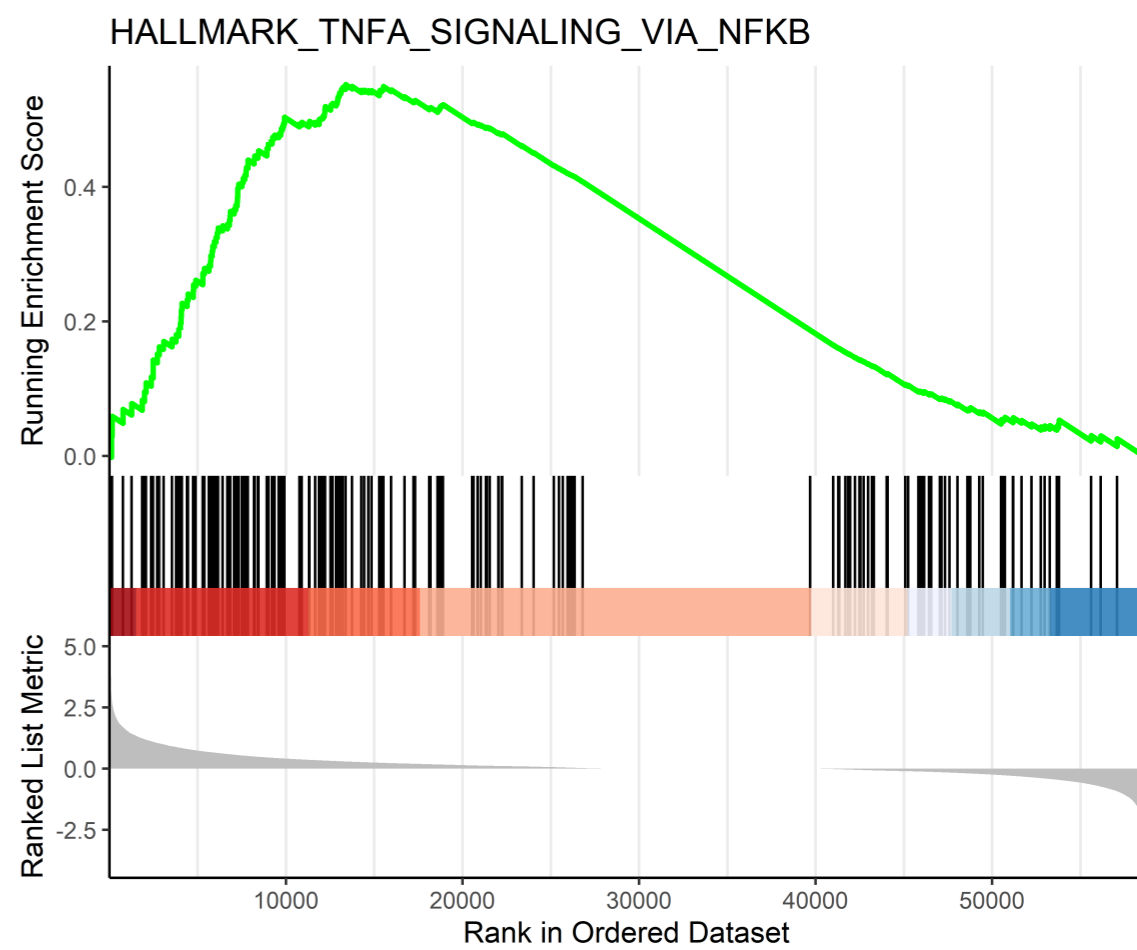

Supplement: DataSheet2.pdf [file DataSheet2.pdf]
