# Supplementary material for: Identification of m6A-Related lncRNAs Associated With Prognoses and Immune Responses in Acute Myeloid Leukemia
Source: PubMed Central journal article supplement (PMC8637120; doi:10.3389/fcell.2021.770451), 2021-11-16
Supplement: DataSheet7.pdf [file DataSheet7.pdf]

**Table S2 Primer sequences for qRT-PCR**

| <b>Gene name</b> |         | <b>Sequences</b>               |
|------------------|---------|--------------------------------|
| GAPDH            | Forward | 5'-GCACCGTCAAGGCTGAGAAC-3'     |
|                  | Reverse | 5'-TGGTGAAGACGCCAGTGGA-3'      |
| USP30-AS1        | Forward | 5'-GAGCAATAGCTGACGGACCA-3'     |
|                  | Reverse | 5'-TGAAAACCAAGCAGCCCCAG-3'     |
| AC114271.2       | Forward | 5'-GATGTGAACAGCGTTGCGTT-3'     |
|                  | Reverse | 5'-CAGTCCCCAGACTTCTGCAAT-3'    |
| AF064858.8       | Forward | 5'-GTAGACGGACCTCAGCACAG-3'     |
|                  | Reverse | 5'-AGGGATGACACGCAGCTAAG-3'     |
| RP11-22L13.1     | Forward | 5'-AAGGTGTCTACCGTGGGACT-3'     |
|                  | Reverse | 5'-CCTTGATCTGAGCCTCGCTT-3'     |
| MIR181A1HG       | Forward | 5'-TCTCCGGCATGAAAACAGGG-3'     |
|                  | Reverse | 5'-TTAGGGTACCACCAACCAAGC-3'    |
| RP11-544A12.4    | Forward | 5'-GACGTTTCCAGGGTCCCATC-3'     |
|                  | Reverse | 5'-AGCTGCTTTTTTCTTGTATCTGGT-3' |
| MIR133A1HG       | Forward | 5'-ATGCTGATTCTGGTGCTTGC-3'     |
|                  | Reverse | 5'-TCAGCAGATGCCCAGAGTTT-3'     |
